# Supplementary material for: The effects of a green Rooibos (Aspalathus linearis) extract on metabolic parameters and adipose tissue biology in rats fed different obesogenic diets
Source: Royal Society of Chemistry journal article supplement (doi:10.1039/d2fo02440c), 2022-01-01
Supplement: d2fo02440c3.pdf [file d2fo02440c3.pdf]

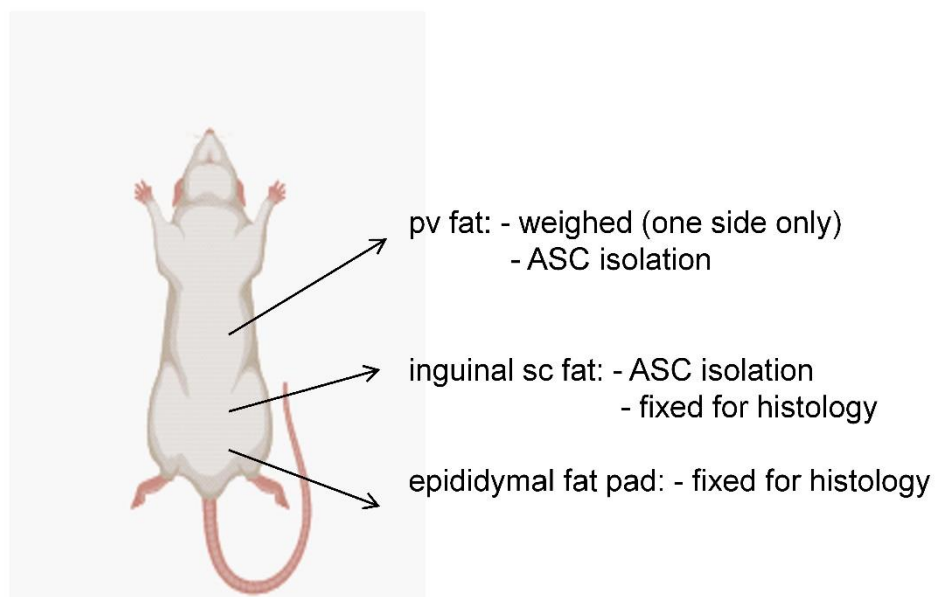

**Figure S1: Diagram showing the utilization of different rat fat depots in this study**

Inguinal subcutaneous (sc) fat, perirenal visceral (pv) fat and epididymal fat pads were excised and used in different downstream applications as indicated. (The image of a rat in a supine position was obtained from BioRender.com.)

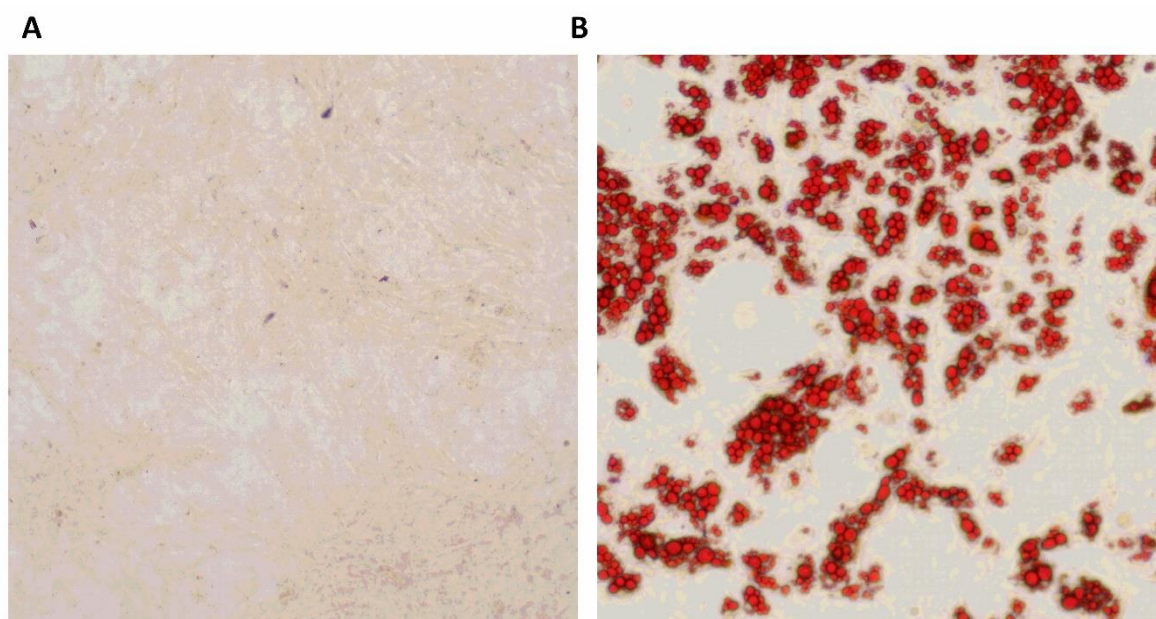

**Figure S2: Lipid accumulation in AM-treated but not CM-treated ASCs**

Representative images of ASCs treated with control media (CM) (panel A) and adipogenic induction media (AM) (panel B) for 12 days after reaching post-confluence in passage 2. Intracellular lipid droplets were stained with ORO and images were captured at 10x magnification.

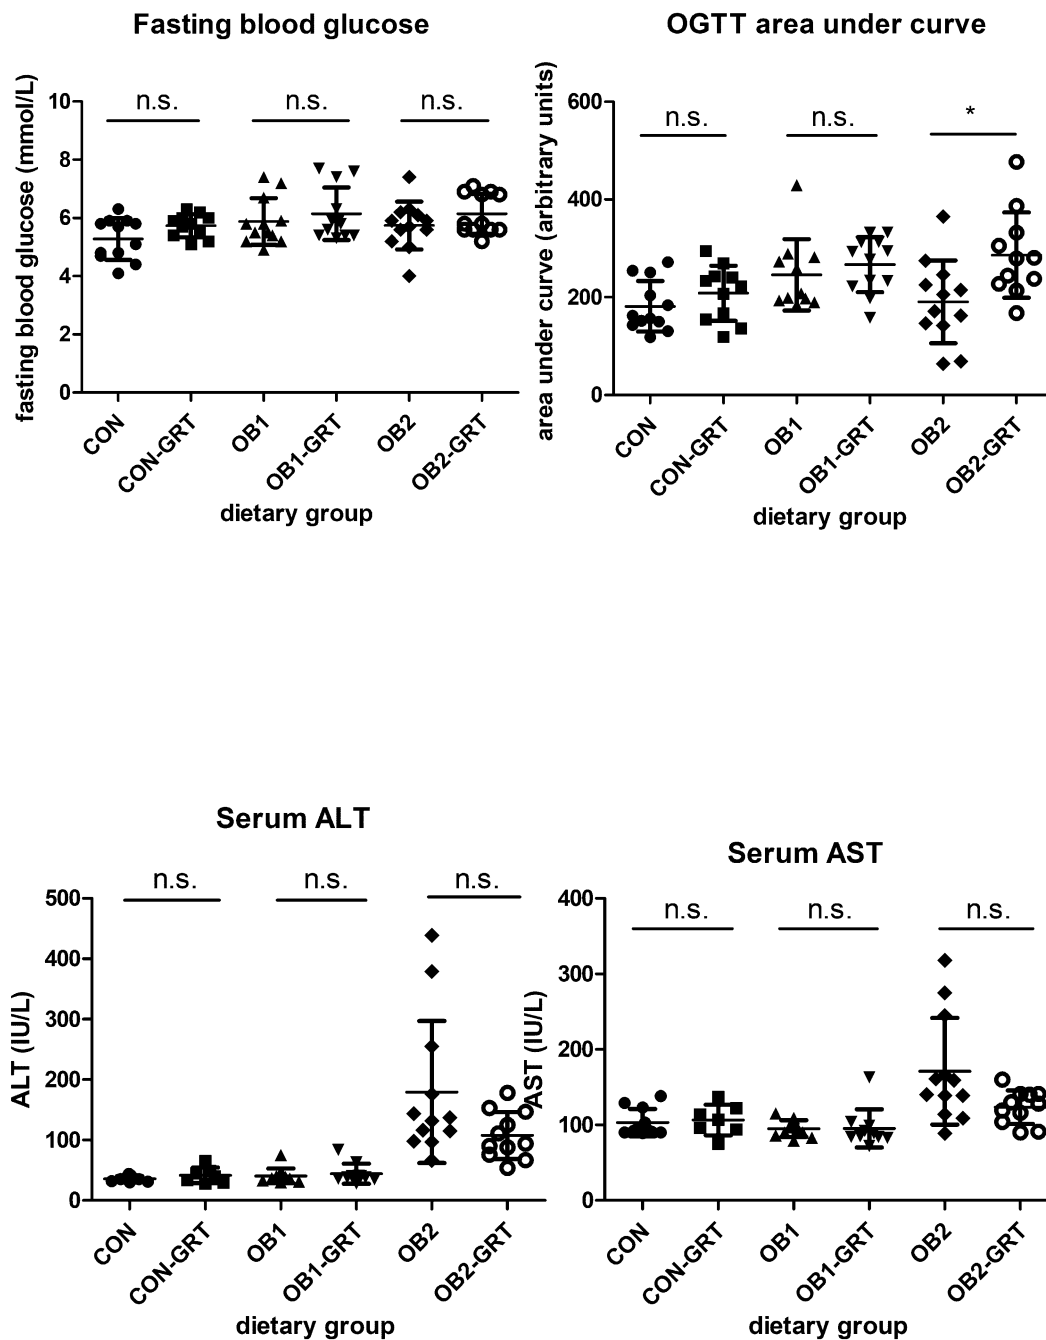

**Figure S3: Group analysis of data for fasting blood glucose, OGTT AUC, serum ALT and serum AST**

Group differences in data for fasting blood glucose (FBG) and oral glucose tolerance test area under the curve (OGTT AUC) measured at 16 weeks, as well as serum alanine transaminase (ALT) and serum aspartate transaminase (AST) measured at the point of euthanasia (17 weeks). For all panels, each data point represents one animal ( $n=11-12$  per group). Data was analysed with one-way ANOVA followed by Bonferroni's multiple comparisons post-hoc test for parametric data (FBG and OGTT AUC) or with Kruskal-Wallis test followed by Dunn's multiple comparisons post-hoc test for non-parametric data (ALT and AST). n.s = not significant.
