# Supplementary material for: The effects of a green Rooibos (Aspalathus linearis) extract on metabolic parameters and adipose tissue biology in rats fed different obesogenic diets
Source: Royal Society of Chemistry journal article supplement (doi:10.1039/d2fo02440c), 2022-01-01
Supplement: d2fo02440c7.xlsx [file d2fo02440c7.xlsx]

## Sheet: CON
Variable	GRT Group=1 Correlations (Copy of new stats June 2022) Marked correlations are significant at p < ,05000
	Epi gamma 10 percentile	Epi gamma 90 percentile	sc	pv	SAT gamma 10 percentile	SAT gamma 90 percentile
Weight at harvest	,6905	,7838	,1326	-,3955	-,4108	-,6861
	N=6	N=6	N=9	N=9	N=6	N=6
	p=,129	p=,065	p=,734	p=,292	p=,418	p=,132
fasted B Glucose	,5598	,3043	-,0542	,6164	-,3734	-,2887
	N=6	N=6	N=9	N=9	N=6	N=6
	p=,248	p=,558	p=,890	p=,077	p=,466	p=,579
pv weight (one side)	,6632	,8031	,5544	,1246	-,6088	-,6984
	N=6	N=6	N=9	N=9	N=6	N=6
	p=,151	p=,054	p=,121	p=,750	p=,200	p=,123
Visceral adiposity Index	,5873	,7155	,5886	,3446	-,6259	-,6316
	N=6	N=6	N=9	N=9	N=6	N=6
	p=,220	p=,110	p=,095	p=,364	p=,184	p=,179
Liver index x 100	,5818	,6423	-,3005	-,4968	-,4354	-,6128
	N=6	N=6	N=9	N=9	N=6	N=6
	p=,226	p=,169	p=,432	p=,174	p=,388	p=,196
log AUC	,5798	,4526	-,3497	,5815	,0596	-,0259
	N=6	N=6	N=9	N=9	N=6	N=6
	p=,228	p=,368	p=,356	p=,100	p=,911	p=,961
F-Ins	-,0124	-,0137	,1900	-,2932	-,7110	-,5606
	N=6	N=6	N=9	N=9	N=6	N=6
	p=,981	p=,979	p=,624	p=,444	p=,113	p=,247
HOMA2 IR	-,0751	-,1789	,2015	-,2660	-,6871	-,4987
	N=6	N=6	N=9	N=9	N=6	N=6
	p=,888	p=,735	p=,603	p=,489	p=,132	p=,314
TG	-,1772	,0321	-,4184	-,3765	,5680	,4918
	N=5	N=5	N=8	N=8	N=5	N=5
	p=,776	p=,959	p=,302	p=,358	p=,318	p=,400
TC	,4156	,6364	-,3065	-,0934	,3750	,2864
	N=5	N=5	N=8	N=8	N=5	N=5
	p=,486	p=,248	p=,460	p=,826	p=,534	p=,640
LDL adj	--	--	-,1803	-,1118	--	--
	N=6	N=6	N=9	N=9	N=6	N=6
	p= ---	p= ---	p=,643	p=,775	p= ---	p= ---
HDL	,3239	,4784	-,2572	-,0454	,2546	,2473
	N=5	N=5	N=8	N=8	N=5	N=5
	p=,595	p=,415	p=,539	p=,915	p=,679	p=,688
ALT	-,8967	-,8549	-,4370	-,3554	,5348	,6833
	N=5	N=5	N=8	N=8	N=5	N=5
	p=,039	p=,065	p=,279	p=,388	p=,353	p=,203
AST	,0026	-,2743	,6383	-,1649	-,8010	-,6383
	N=5	N=5	N=8	N=8	N=5	N=5
	p=,997	p=,655	p=,089	p=,696	p=,103	p=,246
leptin	,2276	,0643	,2345	,8817	-,2070	-,1544
	N=6	N=6	N=9	N=9	N=6	N=6
	p=,664	p=,904	p=,544	p=,002	p=,694	p=,770
adiponectin	,2127	,1072	,0749	-,1554	-,8544	-,6946
	N=6	N=6	N=9	N=9	N=6	N=6
	p=,686	p=,840	p=,848	p=,690	p=,030	p=,126
IL-18	-,0030	,3005	,3227	-,4886	-,1851	-,1572
	N=6	N=6	N=9	N=9	N=6	N=6
	p=,996	p=,563	p=,397	p=,182	p=,726	p=,766
Epi gamma 10 percentile	1,0000	,8854	-,0741	,2956	-,3847	-,6125
	N=6	N=6	N=6	N=6	N=6	N=6
	p= ---	p=,019	p=,889	p=,569	p=,451	p=,196
Epi gamma 90 percentile	,8854	1,0000	,0537	,0745	-,2643	-,4927
	N=6	N=6	N=6	N=6	N=6	N=6
	p=,019	p= ---	p=,920	p=,888	p=,613	p=,321
sc	-,0741	,0537	1,0000	,0323	-,7795	-,5816
	N=6	N=6	N=9	N=9	N=6	N=6
	p=,889	p=,920	p= ---	p=,934	p=,068	p=,226
pv	,2956	,0745	,0323	1,0000	-,0210	,0528
	N=6	N=6	N=9	N=9	N=6	N=6
	p=,569	p=,888	p=,934	p= ---	p=,968	p=,921
SAT gamma 10 percentile	-,3847	-,2643	-,7795	-,0210	1,0000	,9298
	N=6	N=6	N=6	N=6	N=6	N=6
	p=,451	p=,613	p=,068	p=,968	p= ---	p=,007
SAT gamma 90 percentile	-,6125	-,4927	-,5816	,0528	,9298	1,0000
	N=6	N=6	N=6	N=6	N=6	N=6
	p=,196	p=,321	p=,226	p=,921	p=,007	p= ---

## Sheet: CON GRT
Variable	GRT Group=2 Correlations (Copy of new stats June 2022) Marked correlations are significant at p < ,05000
	Epi gamma 10 percentile	Epi gamma 90 percentile	sc	pv	SAT gamma 10 percentile	SAT gamma 90 percentile
Weight at harvest	,8988	,1130	-,2573	-,7168	,5914	,7019
	N=6	N=6	N=10	N=10	N=6	N=6
	p=,015	p=,831	p=,473	p=,020	p=,216	p=,120
fasted B Glucose	,1772	,4260	,1673	,0366	-,4237	,2903
	N=6	N=6	N=10	N=10	N=6	N=6
	p=,737	p=,400	p=,644	p=,920	p=,403	p=,577
pv weight (one side)	,6593	,3571	,1693	-,0220	-,0237	,8474
	N=6	N=6	N=10	N=10	N=6	N=6
	p=,154	p=,487	p=,640	p=,952	p=,964	p=,033
Visceral adiposity Index	,4190	,3828	,2499	,1759	-,2799	,7107
	N=6	N=6	N=10	N=10	N=6	N=6
	p=,408	p=,454	p=,486	p=,627	p=,591	p=,113
Liver index x 100	-,1075	,0255	-,1557	,1045	,5401	-,0655
	N=6	N=6	N=10	N=10	N=6	N=6
	p=,839	p=,962	p=,667	p=,774	p=,269	p=,902
log AUC	,1964	,3385	-,2833	-,3075	,5974	,5217
	N=6	N=6	N=10	N=10	N=6	N=6
	p=,709	p=,512	p=,428	p=,387	p=,210	p=,288
F-Ins	,1507	-,1027	,6540	,4116	-,8591	,1156
	N=6	N=6	N=10	N=10	N=6	N=6
	p=,776	p=,846	p=,040	p=,237	p=,028	p=,827
HOMA2 IR	,1050	-,0962	,6652	,4672	-,8919	,0540
	N=6	N=6	N=10	N=10	N=6	N=6
	p=,843	p=,856	p=,036	p=,173	p=,017	p=,919
TG	-,1113	,3316	,5543	,1401	-,4710	,3107
	N=5	N=5	N=6	N=6	N=5	N=5
	p=,859	p=,586	p=,254	p=,791	p=,423	p=,611
TC	-,9088	-,1607	-,5780	,6251	,1211	-,5778
	N=5	N=5	N=6	N=6	N=5	N=5
	p=,033	p=,796	p=,230	p=,185	p=,846	p=,308
LDL adj	--	--	--	--	--	--
	N=6	N=6	N=10	N=10	N=6	N=6
	p= ---	p= ---	p= ---	p= ---	p= ---	p= ---
HDL	-,9786	-,4404	-,2822	,6876	-,1431	-,7595
	N=5	N=5	N=6	N=6	N=5	N=5
	p=,004	p=,458	p=,588	p=,131	p=,818	p=,136
ALT	,0708	-,0185	-,8174	,3407	,7388	-,1153
	N=5	N=5	N=6	N=6	N=5	N=5
	p=,910	p=,977	p=,047	p=,509	p=,154	p=,854
AST	-,2783	-,0834	-,1411	-,1432	,3936	-,3926
	N=5	N=5	N=6	N=6	N=5	N=5
	p=,650	p=,894	p=,790	p=,787	p=,512	p=,513
leptin	-,1231	,1137	,5901	,0057	-,3257	,3014
	N=6	N=6	N=10	N=10	N=6	N=6
	p=,816	p=,830	p=,073	p=,988	p=,529	p=,562
adiponectin	,0782	-,0625	,4629	,1923	-,7435	,1682
	N=6	N=6	N=10	N=10	N=6	N=6
	p=,883	p=,906	p=,178	p=,594	p=,090	p=,750
IL-18	,3409	,2062	,2144	-,2651	-,0391	,5651
	N=6	N=6	N=10	N=10	N=6	N=6
	p=,508	p=,695	p=,552	p=,459	p=,941	p=,243
Epi gamma 10 percentile	1,0000	,1910	-,2203	-,8932	,2673	,7685
	N=6	N=6	N=5	N=5	N=6	N=6
	p= ---	p=,717	p=,722	p=,041	p=,609	p=,074
Epi gamma 90 percentile	,1910	1,0000	-,4067	,1903	,2690	,6549
	N=6	N=6	N=5	N=5	N=6	N=6
	p=,717	p= ---	p=,497	p=,759	p=,606	p=,158
sc	-,2203	-,4067	1,0000	,1977	-,9045	-,2343
	N=5	N=5	N=10	N=10	N=5	N=5
	p=,722	p=,497	p= ---	p=,584	p=,035	p=,704
pv	-,8932	,1903	,1977	1,0000	-,7697	-,4476
	N=5	N=5	N=10	N=10	N=5	N=5
	p=,041	p=,759	p=,584	p= ---	p=,128	p=,450
SAT gamma 10 percentile	,2673	,2690	-,9045	-,7697	1,0000	,3570
	N=6	N=6	N=5	N=5	N=6	N=6
	p=,609	p=,606	p=,035	p=,128	p= ---	p=,487
SAT gamma 90 percentile	,7685	,6549	-,2343	-,4476	,3570	1,0000
	N=6	N=6	N=5	N=5	N=6	N=6
	p=,074	p=,158	p=,704	p=,450	p=,487	p= ---

## Sheet: OB1
Variable	GRT Group=3 Correlations (Copy of new stats June 2022) Marked correlations are significant at p < ,05000
	Epi gamma 10 percentile	Epi gamma 90 percentile	sc	pv	SAT gamma 10 percentile	SAT gamma 90 percentile
Weight at harvest	,0388	,0687	-,0150	-,3743	,5918	,4441
	N=6	N=6	N=10	N=10	N=6	N=6
	p=,942	p=,897	p=,967	p=,287	p=,216	p=,378
fasted B Glucose	-,1131	-,1785	-,2395	-,3249	,0350	,3704
	N=6	N=6	N=10	N=10	N=6	N=6
	p=,831	p=,735	p=,505	p=,360	p=,948	p=,470
pv weight (one side)	,2018	,6704	,0729	-,0540	,0926	,0786
	N=6	N=6	N=10	N=10	N=6	N=6
	p=,701	p=,145	p=,841	p=,882	p=,861	p=,882
Visceral adiposity Index	,1979	,7019	,0611	,0048	-,0121	,0393
	N=6	N=6	N=10	N=10	N=6	N=6
	p=,707	p=,120	p=,867	p=,990	p=,982	p=,941
Liver index x 100	,5056	-,1955	-,1668	-,1042	,3524	,4030
	N=6	N=6	N=10	N=10	N=6	N=6
	p=,306	p=,711	p=,645	p=,775	p=,493	p=,428
log AUC	,1376	-,2158	,4660	,1162	,5996	-,2882
	N=6	N=6	N=10	N=10	N=6	N=6
	p=,795	p=,681	p=,175	p=,749	p=,208	p=,580
F-Ins	-,1709	-,5875	-,0503	-,2413	,0980	-,7443
	N=6	N=6	N=10	N=10	N=6	N=6
	p=,746	p=,220	p=,890	p=,502	p=,853	p=,090
HOMA2 IR	-,2612	-,6044	-,1493	-,3444	,0758	-,7848
	N=6	N=6	N=10	N=10	N=6	N=6
	p=,617	p=,204	p=,681	p=,330	p=,886	p=,064
TG	-,1566	,1609	,4773	,5736	-,4097	-,4199
	N=6	N=6	N=9	N=9	N=6	N=6
	p=,767	p=,761	p=,194	p=,106	p=,420	p=,407
TC	,2398	,5736	-,4797	-,3042	-,2018	,3805
	N=6	N=6	N=9	N=9	N=6	N=6
	p=,647	p=,234	p=,191	p=,426	p=,701	p=,457
LDL adj	-,3278	,0623	-,5758	-,3911	-,4924	,0487
	N=6	N=6	N=9	N=9	N=6	N=6
	p=,526	p=,907	p=,105	p=,298	p=,321	p=,927
HDL	,8755	,6903	-,3501	-,3008	,4279	,7178
	N=6	N=6	N=9	N=9	N=6	N=6
	p=,022	p=,129	p=,356	p=,432	p=,397	p=,108
ALT	-,4166	,1345	-,3801	-,3281	-,4996	,0914
	N=6	N=6	N=9	N=9	N=6	N=6
	p=,411	p=,799	p=,313	p=,389	p=,313	p=,863
AST	-,1862	,4648	-,3191	-,2282	-,6284	,1092
	N=6	N=6	N=9	N=9	N=6	N=6
	p=,724	p=,353	p=,403	p=,555	p=,181	p=,837
leptin	-,0615	-,0356	,3390	,0078	,4519	-,0393
	N=6	N=6	N=10	N=10	N=6	N=6
	p=,908	p=,947	p=,338	p=,983	p=,368	p=,941
adiponectin	,6512	,2219	,3035	,1455	,4751	,0229
	N=6	N=6	N=10	N=10	N=6	N=6
	p=,161	p=,673	p=,394	p=,688	p=,341	p=,966
IL-18	-,6804	-,6892	,0181	-,2683	-,0750	,0366
	N=6	N=6	N=10	N=10	N=6	N=6
	p=,137	p=,130	p=,960	p=,454	p=,888	p=,945
Epi gamma 10 percentile	1,0000	,5690	-,1748	-,2468	,6146	,4967
	N=6	N=6	N=6	N=6	N=6	N=6
	p= ---	p=,239	p=,740	p=,637	p=,194	p=,316
Epi gamma 90 percentile	,5690	1,0000	-,1670	-,1156	-,0563	,3332
	N=6	N=6	N=6	N=6	N=6	N=6
	p=,239	p= ---	p=,752	p=,827	p=,916	p=,519
sc	-,1748	-,1670	1,0000	,8586	,2368	-,4661
	N=6	N=6	N=10	N=10	N=6	N=6
	p=,740	p=,752	p= ---	p=,001	p=,651	p=,351
pv	-,2468	-,1156	,8586	1,0000	-,1582	-,8104
	N=6	N=6	N=10	N=10	N=6	N=6
	p=,637	p=,827	p=,001	p= ---	p=,765	p=,051
SAT gamma 10 percentile	,6146	-,0563	,2368	-,1582	1,0000	,5299
	N=6	N=6	N=6	N=6	N=6	N=6
	p=,194	p=,916	p=,651	p=,765	p= ---	p=,280
SAT gamma 90 percentile	,4967	,3332	-,4661	-,8104	,5299	1,0000
	N=6	N=6	N=6	N=6	N=6	N=6
	p=,316	p=,519	p=,351	p=,051	p=,280	p= ---

## Sheet: OB1 GRT
Variable	GRT Group=4 Correlations (Copy of new stats June 2022) Marked correlations are significant at p < ,05000
	Epi gamma 10 percentile	Epi gamma 90 percentile	sc	pv	SAT gamma 10 percentile	SAT gamma 90 percentile
Weight at harvest	-,0115	,2634	-,3134	-,3339	-,4528	,5213
	N=6	N=6	N=11	N=11	N=6	N=6
	p=,983	p=,614	p=,348	p=,316	p=,367	p=,289
fasted B Glucose	,5343	-,0192	,5604	,2864	-,5490	-,3195
	N=6	N=6	N=11	N=11	N=6	N=6
	p=,275	p=,971	p=,073	p=,393	p=,259	p=,537
pv weight (one side)	-,0351	,5072	,0524	-,3409	-,3585	,5195
	N=6	N=6	N=11	N=11	N=6	N=6
	p=,947	p=,304	p=,878	p=,305	p=,485	p=,291
Visceral adiposity Index	,0402	,5952	,2139	-,2973	-,3270	,4019
	N=6	N=6	N=11	N=11	N=6	N=6
	p=,940	p=,213	p=,528	p=,375	p=,527	p=,430
Liver index x 100	-,2916	-,4403	-,2036	,3427	,5553	-,2298
	N=6	N=6	N=11	N=11	N=6	N=6
	p=,575	p=,382	p=,548	p=,302	p=,253	p=,661
log AUC	-,0865	,6566	-,0351	-,7758	-,0045	,4787
	N=6	N=6	N=11	N=11	N=6	N=6
	p=,871	p=,157	p=,918	p=,005	p=,993	p=,337
F-Ins	-,1590	-,5374	,4338	,5815	-,9177	-,4932
	N=6	N=6	N=11	N=11	N=6	N=6
	p=,764	p=,272	p=,183	p=,061	p=,010	p=,320
HOMA2 IR	-,4276	-,6684	,0650	,5024	-,9687	-,5684
	N=5	N=5	N=10	N=10	N=5	N=5
	p=,473	p=,217	p=,859	p=,139	p=,007	p=,317
TG	-,7175	-,5222	,0162	-,1193	-,0197	-,6050
	N=5	N=5	N=9	N=9	N=5	N=5
	p=,172	p=,367	p=,967	p=,760	p=,975	p=,280
TC	,5656	,1202	,3084	,1386	,3881	-,3259
	N=5	N=5	N=9	N=9	N=5	N=5
	p=,320	p=,847	p=,419	p=,722	p=,519	p=,593
LDL adj	--	--	--	--	--	--
	N=5	N=5	N=9	N=9	N=5	N=5
	p= ---	p= ---	p= ---	p= ---	p= ---	p= ---
HDL	,7687	,3146	,4247	,1284	,3978	-,1637
	N=5	N=5	N=9	N=9	N=5	N=5
	p=,129	p=,606	p=,255	p=,742	p=,507	p=,793
ALT	,9088	,3708	-,1299	-,1328	,3437	,1078
	N=5	N=5	N=9	N=9	N=5	N=5
	p=,033	p=,539	p=,739	p=,733	p=,571	p=,863
AST	,1298	,6041	-,1655	-,4298	,2784	,0306
	N=5	N=5	N=9	N=9	N=5	N=5
	p=,835	p=,281	p=,671	p=,248	p=,650	p=,961
leptin	-,7931	-,0279	,3360	-,0026	-,0744	,2267
	N=6	N=6	N=11	N=11	N=6	N=6
	p=,060	p=,958	p=,312	p=,994	p=,889	p=,666
adiponectin	,0017	,1382	,2307	-,0675	,5148	-,2826
	N=6	N=6	N=11	N=11	N=6	N=6
	p=,997	p=,794	p=,495	p=,844	p=,296	p=,587
IL-18	,4326	,4904	,2815	-,1174	-,2530	-,0526
	N=6	N=6	N=11	N=11	N=6	N=6
	p=,392	p=,323	p=,402	p=,731	p=,629	p=,921
Epi gamma 10 percentile	1,0000	,6227	-,4047	-,2602	,2869	,2848
	N=6	N=6	N=5	N=5	N=6	N=6
	p= ---	p=,187	p=,499	p=,672	p=,581	p=,584
Epi gamma 90 percentile	,6227	1,0000	-,2110	-,9230	,4647	,7335
	N=6	N=6	N=5	N=5	N=6	N=6
	p=,187	p= ---	p=,733	p=,025	p=,353	p=,097
sc	-,4047	-,2110	1,0000	,5135	,4755	-,1801
	N=5	N=5	N=11	N=11	N=5	N=5
	p=,499	p=,733	p= ---	p=,106	p=,418	p=,772
pv	-,2602	-,9230	,5135	1,0000	-,1640	-,5690
	N=5	N=5	N=11	N=11	N=5	N=5
	p=,672	p=,025	p=,106	p= ---	p=,792	p=,317
SAT gamma 10 percentile	,2869	,4647	,4755	-,1640	1,0000	,5170
	N=6	N=6	N=5	N=5	N=6	N=6
	p=,581	p=,353	p=,418	p=,792	p= ---	p=,294
SAT gamma 90 percentile	,2848	,7335	-,1801	-,5690	,5170	1,0000
	N=6	N=6	N=5	N=5	N=6	N=6
	p=,584	p=,097	p=,772	p=,317	p=,294	p= ---

## Sheet: OB2
Variable	GRT Group=5 Correlations (Copy of new stats June 2022) Marked correlations are significant at p < ,05000
	Epi gamma 10 percentile	Epi gamma 90 percentile	sc	pv	SAT gamma 10 percentile	SAT gamma 90 percentile
Weight at harvest	,5982	,8939	-,8294	-,8012	,3400	,8744
	N=6	N=6	N=9	N=9	N=6	N=6
	p=,210	p=,016	p=,006	p=,009	p=,510	p=,023
fasted B Glucose	-,5062	,3055	-,1680	-,0405	-,8781	,1748
	N=6	N=6	N=9	N=9	N=6	N=6
	p=,306	p=,556	p=,666	p=,918	p=,021	p=,740
pv weight (one side)	,6356	,8605	-,4589	-,5641	,1598	,9881
	N=6	N=6	N=9	N=9	N=6	N=6
	p=,175	p=,028	p=,214	p=,114	p=,762	p=,000
Visceral adiposity Index	,6231	,8423	-,4068	-,5251	,1464	,9853
	N=6	N=6	N=9	N=9	N=6	N=6
	p=,186	p=,035	p=,277	p=,147	p=,782	p=,000
Liver index x 100	-,4834	-,4361	,5423	,3081	-,2982	-,3037
	N=6	N=6	N=9	N=9	N=6	N=6
	p=,331	p=,387	p=,131	p=,420	p=,566	p=,559
log AUC	-,3516	,2687	,0487	,1626	-,6125	,2334
	N=6	N=6	N=9	N=9	N=6	N=6
	p=,494	p=,607	p=,901	p=,676	p=,196	p=,656
F-Ins	,1909	,9209	,1321	,0493	-,2687	,7853
	N=5	N=5	N=8	N=8	N=5	N=5
	p=,758	p=,026	p=,755	p=,908	p=,662	p=,116
HOMA2 IR	,1707	,9400	,1777	,2290	-,2268	,7838
	N=5	N=5	N=7	N=7	N=5	N=5
	p=,784	p=,017	p=,703	p=,621	p=,714	p=,117
TG	-,4053	-,0999	,0421	,2491	-,0418	-,2969
	N=6	N=6	N=9	N=9	N=6	N=6
	p=,425	p=,851	p=,914	p=,518	p=,937	p=,568
TC	-,3792	-,4599	,4174	,3100	,0864	-,4206
	N=6	N=6	N=9	N=9	N=6	N=6
	p=,458	p=,359	p=,264	p=,417	p=,871	p=,406
LDL adj	-,5170	-,5057	,4060	,2935	-,0059	-,5291
	N=6	N=6	N=9	N=9	N=6	N=6
	p=,294	p=,306	p=,278	p=,443	p=,991	p=,280
HDL	,4943	-,1073	,3590	,2006	,6284	,2511
	N=6	N=6	N=9	N=9	N=6	N=6
	p=,319	p=,840	p=,343	p=,605	p=,181	p=,631
ALT	-,4973	,3824	-,1047	-,2929	-,5256	,2147
	N=6	N=6	N=9	N=9	N=6	N=6
	p=,316	p=,454	p=,789	p=,444	p=,284	p=,683
AST	-,6268	,1073	,0297	-,1070	-,5489	-,0441
	N=6	N=6	N=9	N=9	N=6	N=6
	p=,183	p=,840	p=,940	p=,784	p=,259	p=,934
leptin	,2506	,4953	-,5704	-,5077	,6223	,2212
	N=6	N=6	N=9	N=9	N=6	N=6
	p=,632	p=,318	p=,109	p=,163	p=,187	p=,674
adiponectin	,5191	,4627	-,1308	-,1804	,4217	,4670
	N=6	N=6	N=9	N=9	N=6	N=6
	p=,291	p=,355	p=,737	p=,642	p=,405	p=,350
IL-18	,6987	,7068	-,0366	,3393	,6841	,7003
	N=6	N=6	N=9	N=9	N=6	N=6
	p=,122	p=,116	p=,926	p=,372	p=,134	p=,121
Epi gamma 10 percentile	1,0000	,4109	-,1723	-,3877	,7197	,7053
	N=6	N=6	N=5	N=5	N=6	N=6
	p= ---	p=,418	p=,782	p=,519	p=,107	p=,117
Epi gamma 90 percentile	,4109	1,0000	-,8631	-,9141	,1307	,8700
	N=6	N=6	N=5	N=5	N=6	N=6
	p=,418	p= ---	p=,060	p=,030	p=,805	p=,024
sc	-,1723	-,8631	1,0000	,8711	,0453	-,5600
	N=5	N=5	N=9	N=9	N=5	N=5
	p=,782	p=,060	p= ---	p=,002	p=,942	p=,326
pv	-,3877	-,9141	,8711	1,0000	,0242	-,7645
	N=5	N=5	N=9	N=9	N=5	N=5
	p=,519	p=,030	p=,002	p= ---	p=,969	p=,132
SAT gamma 10 percentile	,7197	,1307	,0453	,0242	1,0000	,2625
	N=6	N=6	N=5	N=5	N=6	N=6
	p=,107	p=,805	p=,942	p=,969	p= ---	p=,615
SAT gamma 90 percentile	,7053	,8700	-,5600	-,7645	,2625	1,0000
	N=6	N=6	N=5	N=5	N=6	N=6
	p=,117	p=,024	p=,326	p=,132	p=,615	p= ---

## Sheet: OB2 GRT
Variable	GRT Group=6 Correlations (Copy of new stats June 2022) Marked correlations are significant at p < ,05000
	Epi gamma 10 percentile	Epi gamma 90 percentile	sc	pv	SAT gamma 10 percentile	SAT gamma 90 percentile
Weight at harvest	-,0112	,8150	,3615	-,5232	,6544	,7822
	N=6	N=6	N=12	N=12	N=6	N=6
	p=,983	p=,048	p=,248	p=,081	p=,159	p=,066
fasted B Glucose	,3812	-,3591	-,3646	,3305	-,7548	-,9554
	N=6	N=6	N=12	N=12	N=6	N=6
	p=,456	p=,484	p=,244	p=,294	p=,083	p=,003
pv weight (one side)	,3313	,5265	,2863	-,2944	,4551	,2807
	N=6	N=6	N=12	N=12	N=6	N=6
	p=,521	p=,283	p=,367	p=,353	p=,364	p=,590
Visceral adiposity Index	,3795	,3519	,2292	-,1707	,3339	,0777
	N=6	N=6	N=12	N=12	N=6	N=6
	p=,458	p=,494	p=,474	p=,596	p=,518	p=,884
Liver index x 100	-,2533	-,8865	-,4489	,3818	-,1565	-,4284
	N=6	N=6	N=12	N=12	N=6	N=6
	p=,628	p=,019	p=,143	p=,221	p=,767	p=,397
log AUC	-,5956	-,3708	-,0919	-,1155	,6447	,1744
	N=6	N=6	N=12	N=12	N=6	N=6
	p=,212	p=,469	p=,776	p=,721	p=,167	p=,741
F-Ins	,1667	,4100	,2543	-,0369	-,4506	-,4925
	N=6	N=6	N=11	N=11	N=6	N=6
	p=,752	p=,419	p=,450	p=,914	p=,370	p=,321
HOMA2 IR	,8628	,3254	,1176	,3266	-,4273	-,4610
	N=5	N=5	N=10	N=10	N=5	N=5
	p=,060	p=,593	p=,746	p=,357	p=,473	p=,435
TG	,5030	-,3298	,1992	-,2243	-,4407	-,1291
	N=6	N=6	N=11	N=11	N=6	N=6
	p=,309	p=,523	p=,557	p=,507	p=,382	p=,807
TC	,2639	-,5340	-,1674	-,0018	-,1671	,0331
	N=6	N=6	N=11	N=11	N=6	N=6
	p=,613	p=,275	p=,623	p=,996	p=,752	p=,950
LDL adj	-,0241	-,3678	,0369	-,0485	,0952	,3476
	N=6	N=6	N=11	N=11	N=6	N=6
	p=,964	p=,473	p=,914	p=,887	p=,858	p=,500
HDL	-,0407	-,0423	-,1853	-,1034	,4320	,4807
	N=6	N=6	N=11	N=11	N=6	N=6
	p=,939	p=,937	p=,586	p=,762	p=,392	p=,335
ALT	,1801	,4512	,4421	,4195	,2554	,3057
	N=6	N=6	N=11	N=11	N=6	N=6
	p=,733	p=,369	p=,173	p=,199	p=,625	p=,556
AST	-,4547	-,2212	,1386	,5247	,1847	,3329
	N=6	N=6	N=11	N=11	N=6	N=6
	p=,365	p=,674	p=,685	p=,097	p=,726	p=,519
leptin	,3996	,8679	,6414	-,0886	-,0185	,2549
	N=6	N=6	N=12	N=12	N=6	N=6
	p=,433	p=,025	p=,025	p=,784	p=,972	p=,626
adiponectin	-,0712	,7938	,4293	-,4365	,2378	,2350
	N=6	N=6	N=11	N=11	N=6	N=6
	p=,893	p=,059	p=,188	p=,180	p=,650	p=,654
IL-18	-,3997	,3516	,0078	,3523	,0267	-,2110
	N=6	N=6	N=12	N=12	N=6	N=6
	p=,432	p=,494	p=,981	p=,261	p=,960	p=,688
Epi gamma 10 percentile	1,0000	,0386	,0047	,6690	-,4828	-,3290
	N=6	N=6	N=6	N=6	N=6	N=6
	p= ---	p=,942	p=,993	p=,146	p=,332	p=,524
Epi gamma 90 percentile	,0386	1,0000	,9485	-,1995	,2539	,5494
	N=6	N=6	N=6	N=6	N=6	N=6
	p=,942	p= ---	p=,004	p=,705	p=,627	p=,259
sc	,0047	,9485	1,0000	-,2525	,3282	,6801
	N=6	N=6	N=12	N=12	N=6	N=6
	p=,993	p=,004	p= ---	p=,429	p=,525	p=,137
pv	,6690	-,1995	-,2525	1,0000	,0758	-,1305
	N=6	N=6	N=12	N=12	N=6	N=6
	p=,146	p=,705	p=,429	p= ---	p=,886	p=,805
SAT gamma 10 percentile	-,4828	,2539	,3282	,0758	1,0000	,8154
	N=6	N=6	N=6	N=6	N=6	N=6
	p=,332	p=,627	p=,525	p=,886	p= ---	p=,048
SAT gamma 90 percentile	-,3290	,5494	,6801	-,1305	,8154	1,0000
	N=6	N=6	N=6	N=6	N=6	N=6
	p=,524	p=,259	p=,137	p=,805	p=,048	p= ---
