# Supplementary figures and images for: The effects of a green Rooibos (Aspalathus linearis) extract on metabolic parameters and adipose tissue biology in rats fed different obesogenic diets
Source: Royal Society of Chemistry journal article supplement (doi:10.1039/d2fo02440c), 2022-01-01

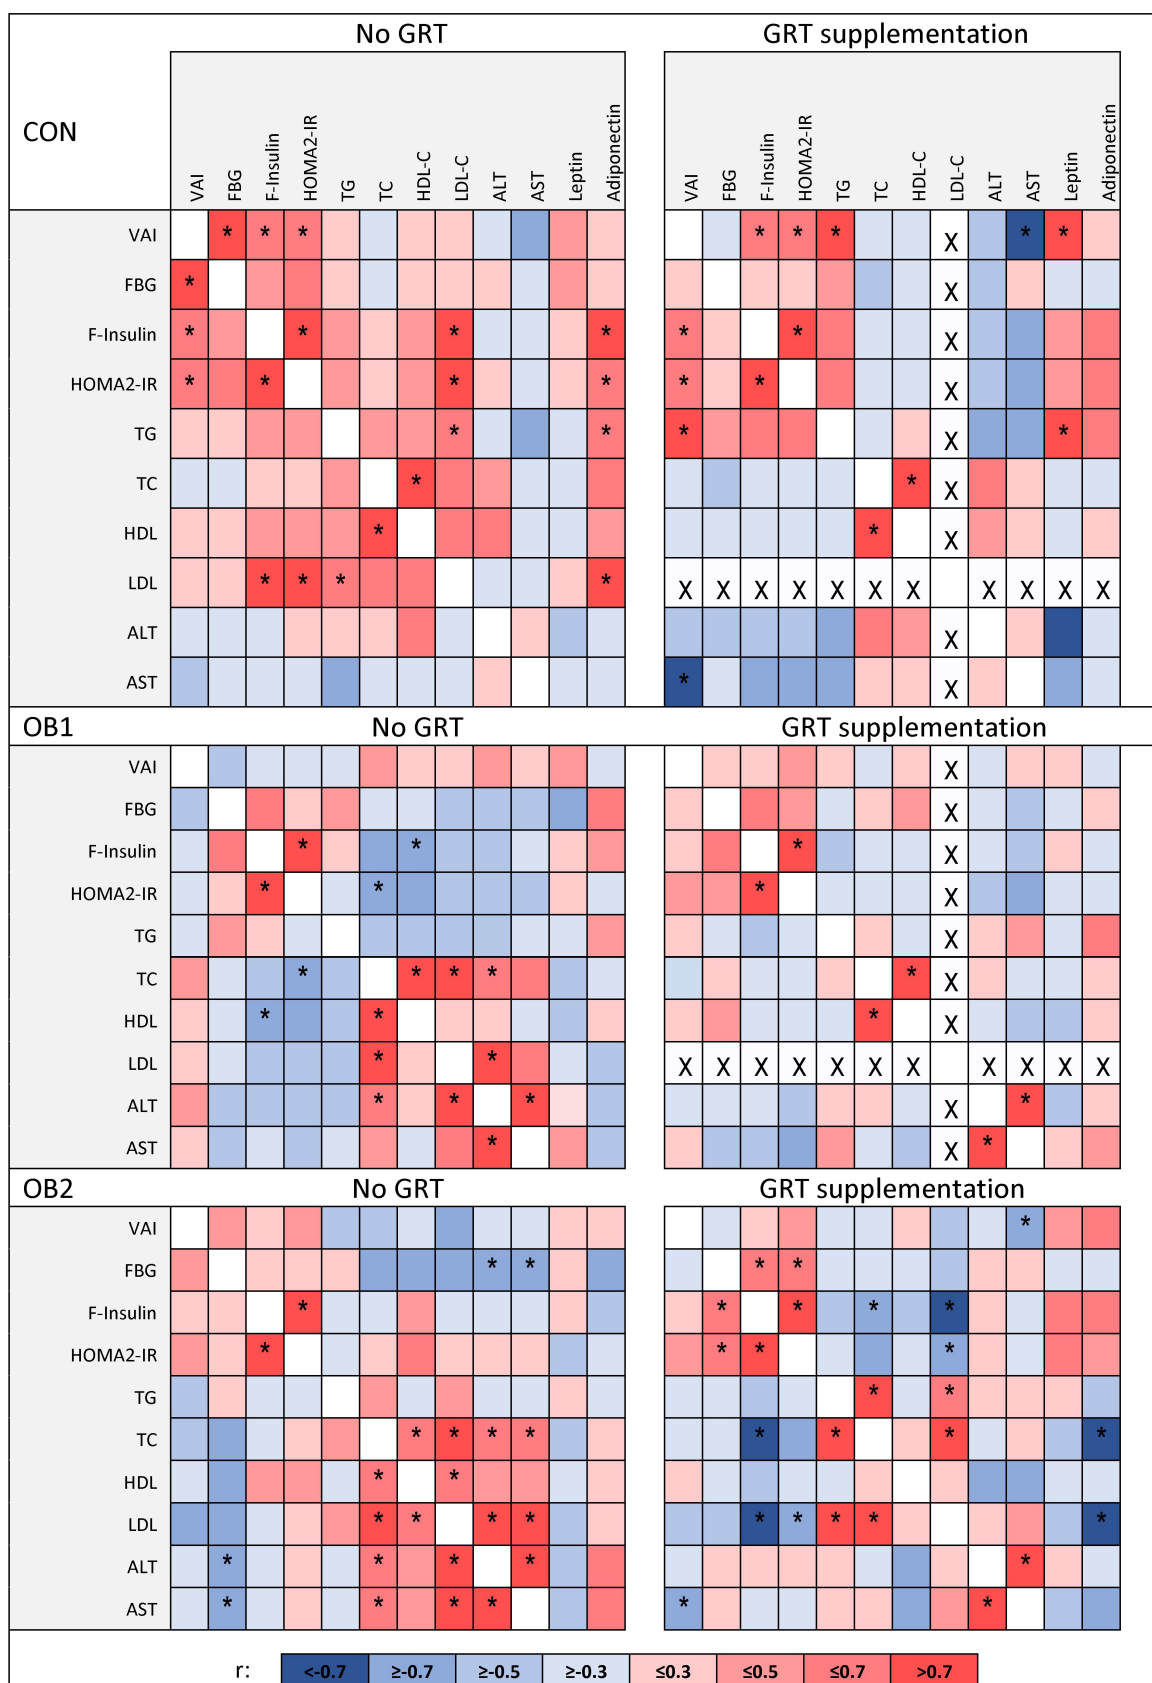

Supplement: d2fo02440c1.pdf [file d2fo02440c1.pdf]

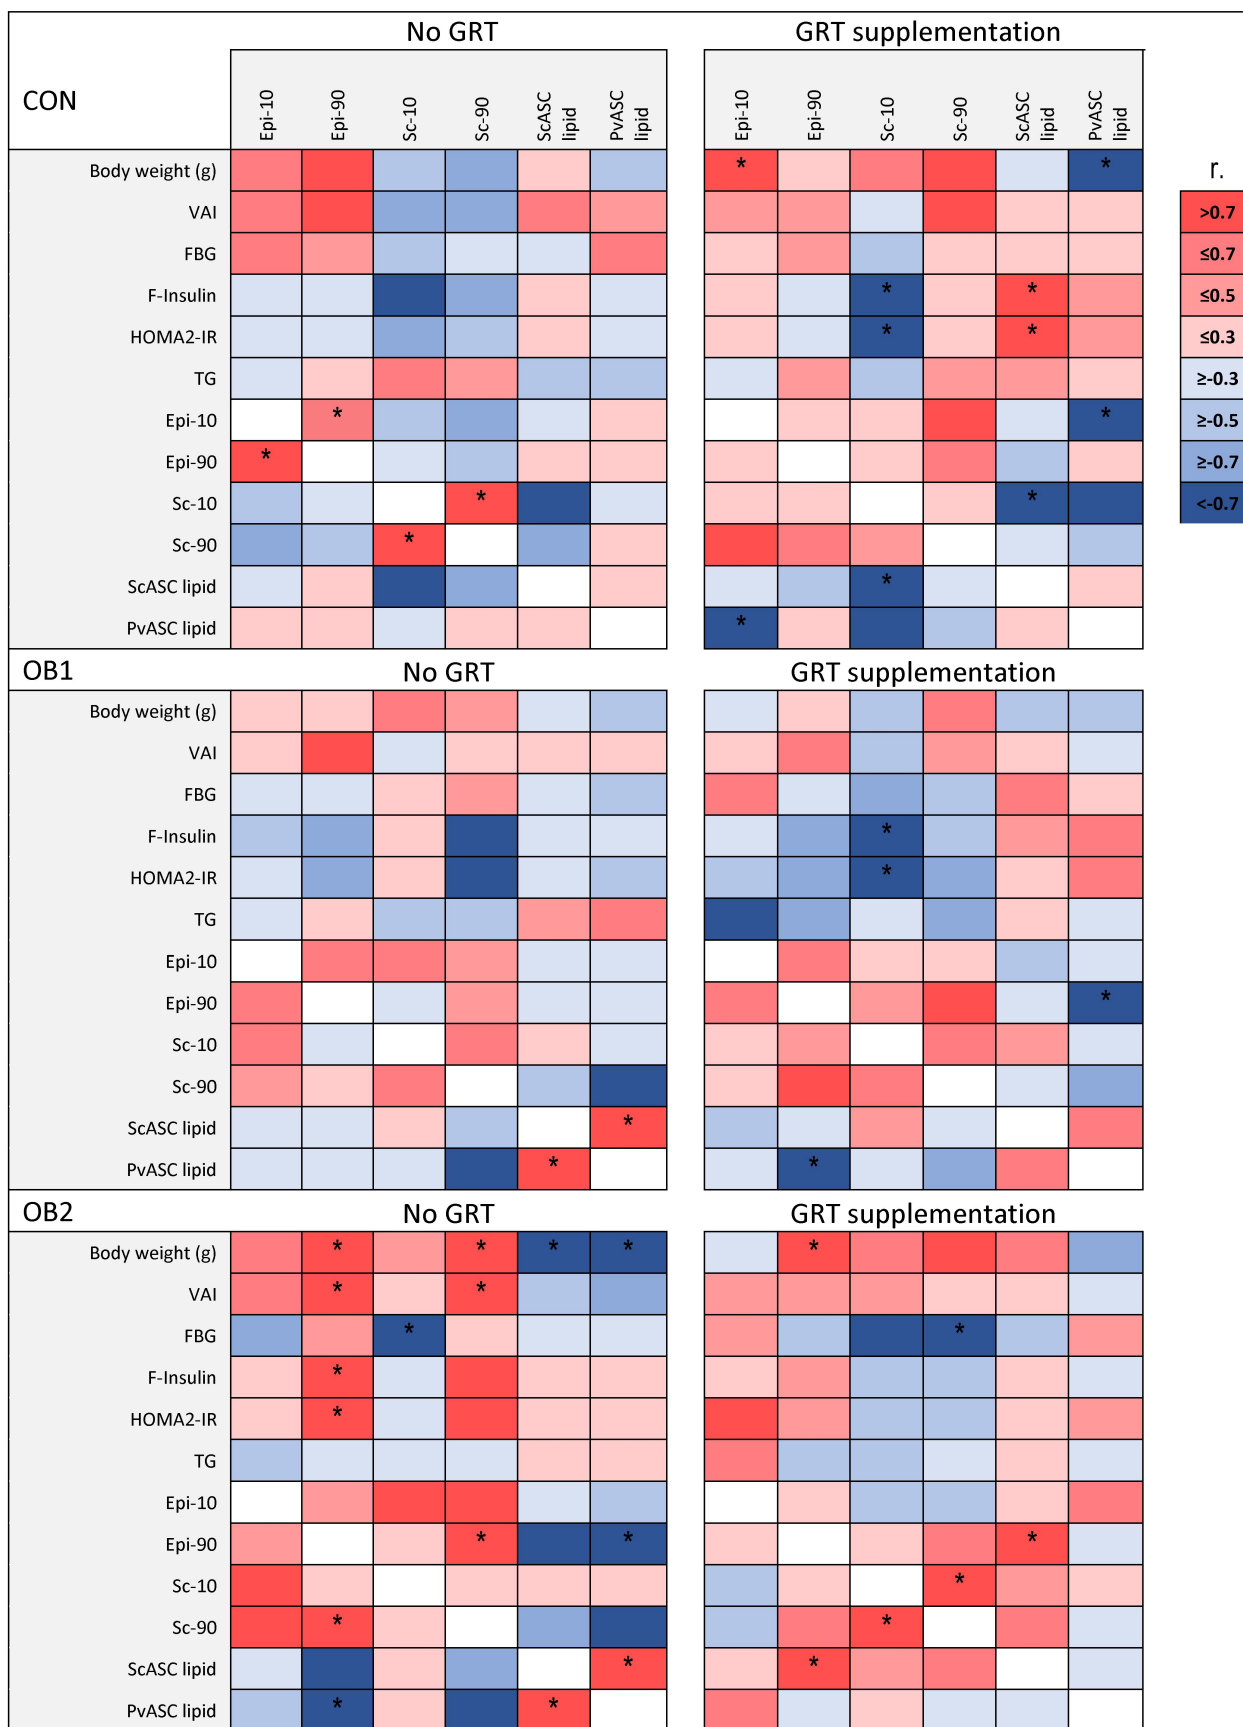

Supplement: d2fo02440c2.pdf [file d2fo02440c2.pdf]

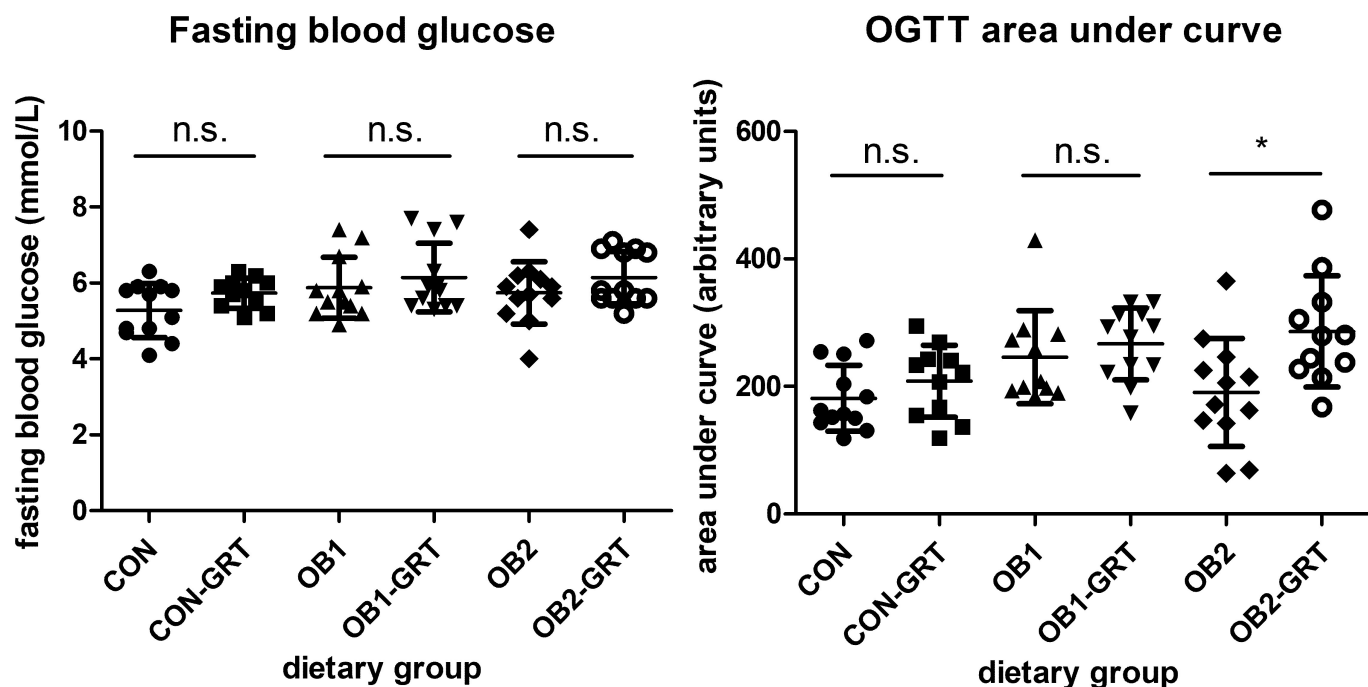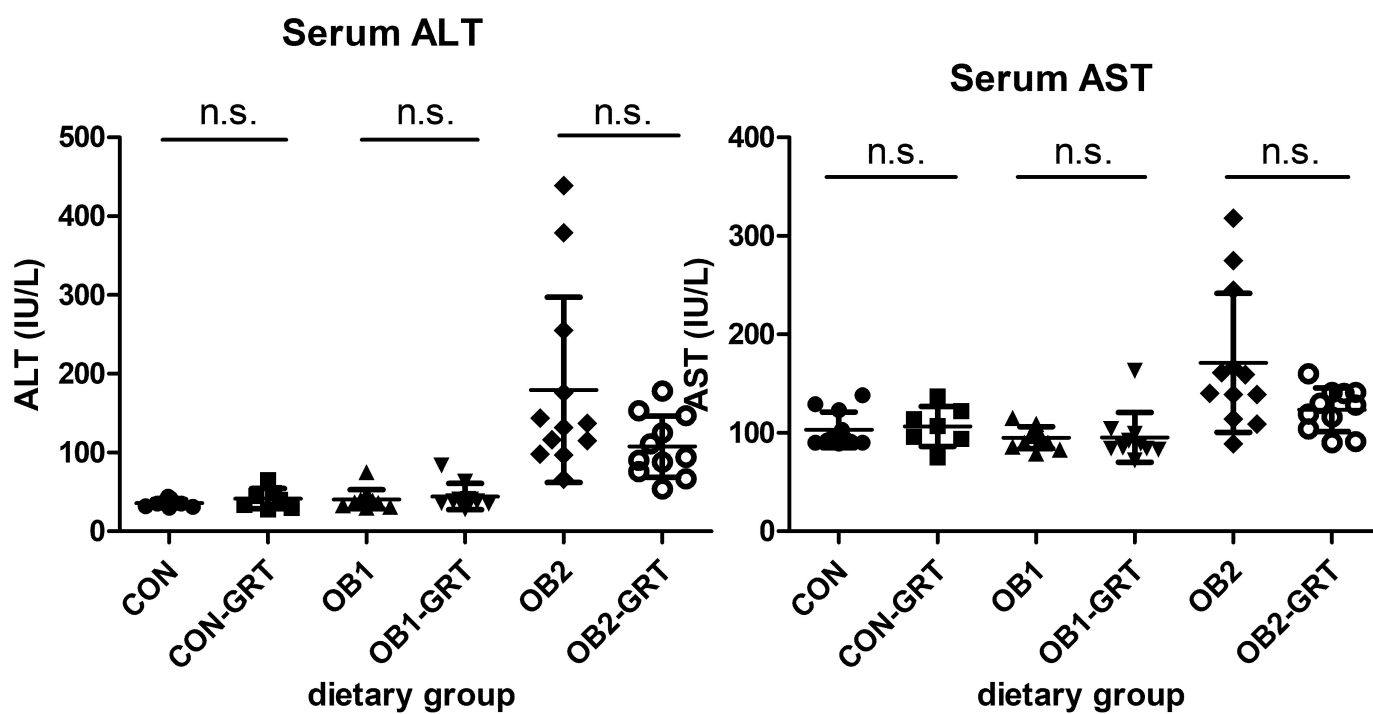

Supplement: d2fo02440c5.pdf [file d2fo02440c5.pdf]
